# Supplementary material for: Socio-occupational class, region of birth and maternal age: influence on time to detection of cryptorchidism (undescended testes): a Danish nationwide register study
Source: PubMed Central journal article supplement (PMC4016268; doi:10.1186/1471-2490-14-23), 2014-02-28
Supplement: 1471-2490-14-23-S1.pdf [file 1471-2490-14-23-S1.pdf]

Table A1: Orchiopexy rate ratios (ORR) and median time to orchiopexy (TTO) among cryptorchidism cases born in Denmark 1981-1994, by socio-occupational group, birth region and maternal age

|                                             | 1981 - 1987 |            |      |             | 1988 - 1994 |            |      |             |
|---------------------------------------------|-------------|------------|------|-------------|-------------|------------|------|-------------|
|                                             | N           | Median TTO | ORR  | 95% CI      | N           | Median TTO | ORR  | 95% CI      |
| <b>Socio-occupational group</b>             |             |            |      |             |             |            |      |             |
| White collar 1                              | 457         | 8.33       | 1.07 | 0.94 - 1.21 | 467         | 6.63       | 0.93 | 0.82 - 1.05 |
| White collar 2                              | 841         | 8.30       | 0.99 | 0.90 - 1.09 | 667         | 6.82       | 0.94 | 0.84 - 1.05 |
| White collar 3                              | 1681        | 8.50       | 1.02 | 0.94 - 1.11 | 1142        | 6.96       | 0.93 | 0.85 - 1.02 |
| Skilled manual workers                      | 522         | 8.10       | 1.09 | 0.98 - 1.21 | 390         | 6.57       | 0.98 | 0.87 - 1.12 |
| Unskilled manual workers                    | 875         | 8.43       | 1.00 |             | 722         | 6.68       | 1.00 |             |
| <b>County</b>                               |             |            |      |             |             |            |      |             |
| Copenhagen (County)                         | 410         | 8.36       | 1.00 |             | 385         | 6.63       | 1.00 |             |
| Copenhagen and Frederiksberg municipalities | 303         | 8.24       | 1.08 | 0.93 - 1.25 | 278         | 6.39       | 0.98 | 0.83 - 1.14 |
| Frederiksberg                               | 238         | 8.88       | 0.94 | 0.81 - 1.09 | 211         | 6.80       | 1.02 | 0.87 - 1.19 |
| Roskilde                                    | 141         | 8.88       | 0.84 | 0.70 - 1.00 | 110         | 7.83       | 0.78 | 0.63 - 0.95 |
| Western Zealand                             | 187         | 9.89       | 0.75 | 0.64 - 0.87 | 138         | 6.96       | 0.88 | 0.73 - 1.06 |
| Storstrøm                                   | 178         | 8.23       | 0.91 | 0.76 - 1.09 | 146         | 7.12       | 0.94 | 0.78 - 1.12 |
| Bornholm                                    | 41          | 8.70       | 0.84 | 0.59 - 1.19 | 22          | 6.53       | 0.98 | 0.66 - 1.47 |
| Funen                                       | 451         | 7.64       | 1.16 | 1.02 - 1.32 | 360         | 7.23       | 0.91 | 0.79 - 1.05 |
| Southern Jutland                            | 249         | 8.73       | 0.87 | 0.75 - 1.01 | 173         | 5.77       | 1.16 | 0.97 - 1.39 |
| Ribe                                        | 238         | 7.18       | 1.18 | 0.98 - 1.41 | 151         | 5.58       | 1.21 | 0.99 - 1.48 |
| Vejle                                       | 330         | 8.33       | 0.97 | 0.84 - 1.12 | 250         | 6.16       | 1.03 | 0.87 - 1.22 |
| Ringkøbing                                  | 264         | 8.75       | 0.90 | 0.78 - 1.05 | 217         | 6.90       | 0.98 | 0.83 - 1.16 |
| Aarhus                                      | 674         | 7.94       | 1.04 | 0.92 - 1.18 | 474         | 6.71       | 1.00 | 0.87 - 1.16 |
| Viborg                                      | 216         | 7.54       | 1.04 | 0.87 - 1.25 | 152         | 6.69       | 0.88 | 0.72 - 1.07 |
| Northern Jutland                            | 456         | 9.35       | 0.81 | 0.71 - 0.92 | 321         | 7.50       | 0.82 | 0.71 - 0.96 |
| <b>Maternal age</b>                         |             |            |      |             |             |            |      |             |
| <25                                         | 1539        | 8.48       | 1.00 |             | 840         | 6.80       | 1.00 |             |
| 25-29                                       | 1700        | 8.26       | 0.99 | 0.93 - 1.07 | 1400        | 6.67       | 1.04 | 0.95 - 1.13 |
| 30-34                                       | 868         | 8.44       | 1.02 | 0.94 - 1.11 | 870         | 7.11       | 0.95 | 0.86 - 1.05 |
| >35                                         | 269         | 8.44       | 0.96 | 0.84 - 1.09 | 278         | 6.64       | 1.14 | 1.00 - 1.30 |

TTO: Time to orchiopexy (median value). ORR: Orchiopexy rate ratios.
